# Supplementary material
Source: PubMed Central journal article supplement (PMC11383739)

## Supporting Information

The following Supporting Information is available for this article:

**Figure S1** A scheme showing the experimental steps of low phosphate treatment experimental steps. LP, low phosphorus; NP, normal phosphorus.

**Figure S2** Comparison of root length in WT treated with low phosphorus (LP) and normal phosphorus (NP) conditions.

**Figure S3** Comparison of AR number in cuttings directly treated with low phosphorus (LP) and normal phosphorus (NP) conditions.

**Figure S4** RT-qPCR analysis of Pi starvation induction related DEGs from RNA-seq experiment.

**Figure S5** The multilayered hierarchical gene regulatory network (ML-hGRN) built with Bottom-up GGM algorithm where PuMYB40 and PuWRKY75 are located at the third layer and regulate LPR1 and ERF003. The genes involved in adventitious rooting (AR) related biological processes are located at the bottom layer.

**Figure S6** PCR and RT-qPCR verified the expression level of *PuMYB40* in *PuMYB40*-overexpression (OE) and *PuMYB40-SRDX* lines.

**Figure S7** Phylogenetic analysis and expression pattern of *PuWRKY75*.

**Figure S8** PCR and RT-qPCR verified the expression level of *PuWRKY75* in *PuWRKY75*-overexpression (OE) and *PuWRKY75-SRDX* lines.

**Figure S9** The promoter sequence of *PuLRP1* and *PuERF003*.

**Figure S10** PCR and RT-qPCR verified the expression level of *PuLRP1* and *PuERF003* in *PuLRP1* and *PuERF003* transgenic lines, respectively.

**Figure S1** A scheme showing the experimental steps of low phosphate treatment experimental steps. LP, low phosphorus; NP, normal phosphorus.

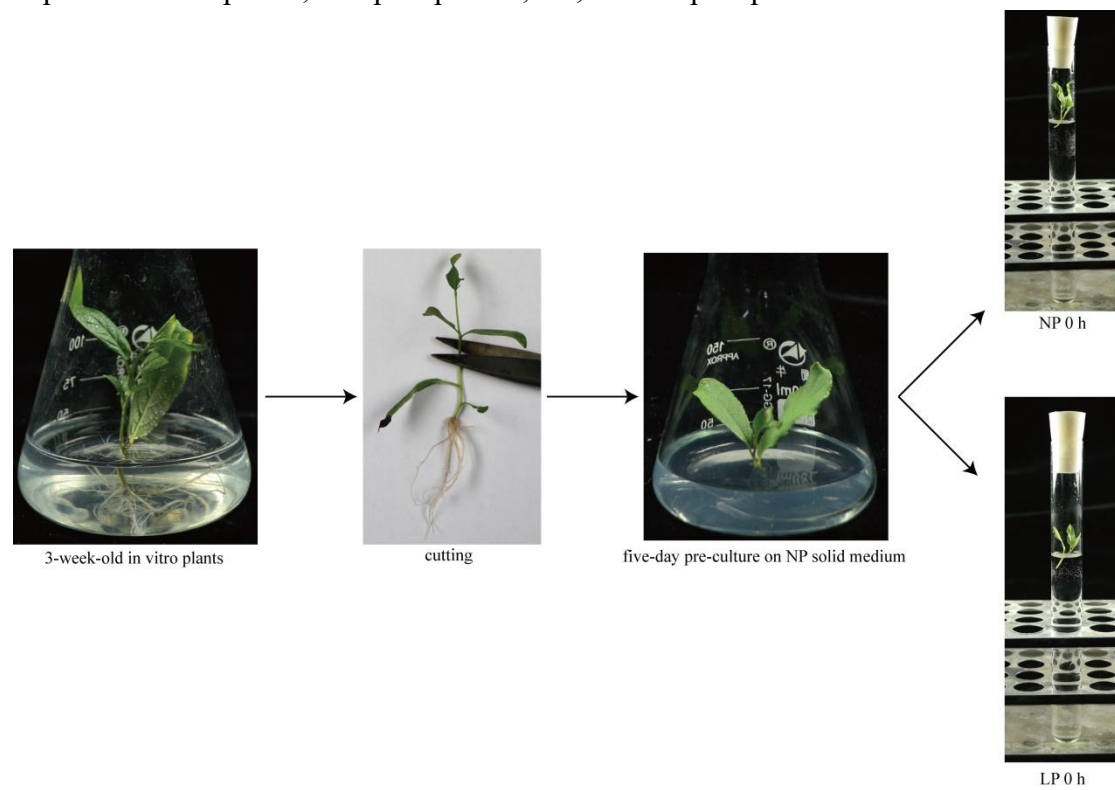

**Figure S2** Comparison of root length in WT treated with low phosphorus (LP) and normal phosphorus (NP) conditions. Comparison of root length of *PuWRKY75* transgenic lines and WT under LP condition. values represent the mean  $\pm$  SD of 50 plants. Significant differences compared based on one-way ANOVA and Duncan's multiple range test: \*\* $p < 0.01$ .

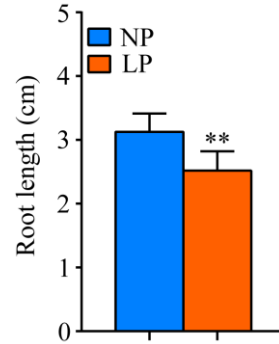

**Figure S3** Comparison of AR number in cuttings directly treated with low phosphorus (LP) and normal phosphorus (NP) conditions. Each mean and standard deviation (SD) were calculated from 30 cuttings. The ns represents no significance of AR number in WT between LP and NP conditions, based on one-way ANOVA and Duncan's multiple range test.

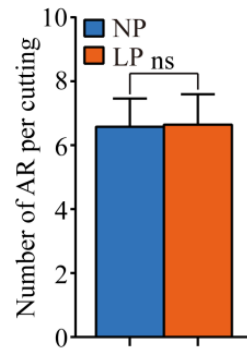

**Figure S4** Quantitative analysis of the expression levels of Pi starvation induction related DEGs from RNA-seq experiment. *PuActin7* and *PuUBQ10* served as internal control. The asterisks indicate significant (\*\*  $p < 0.01$ ) difference between NP and LP stress, based on Student's *t* test.

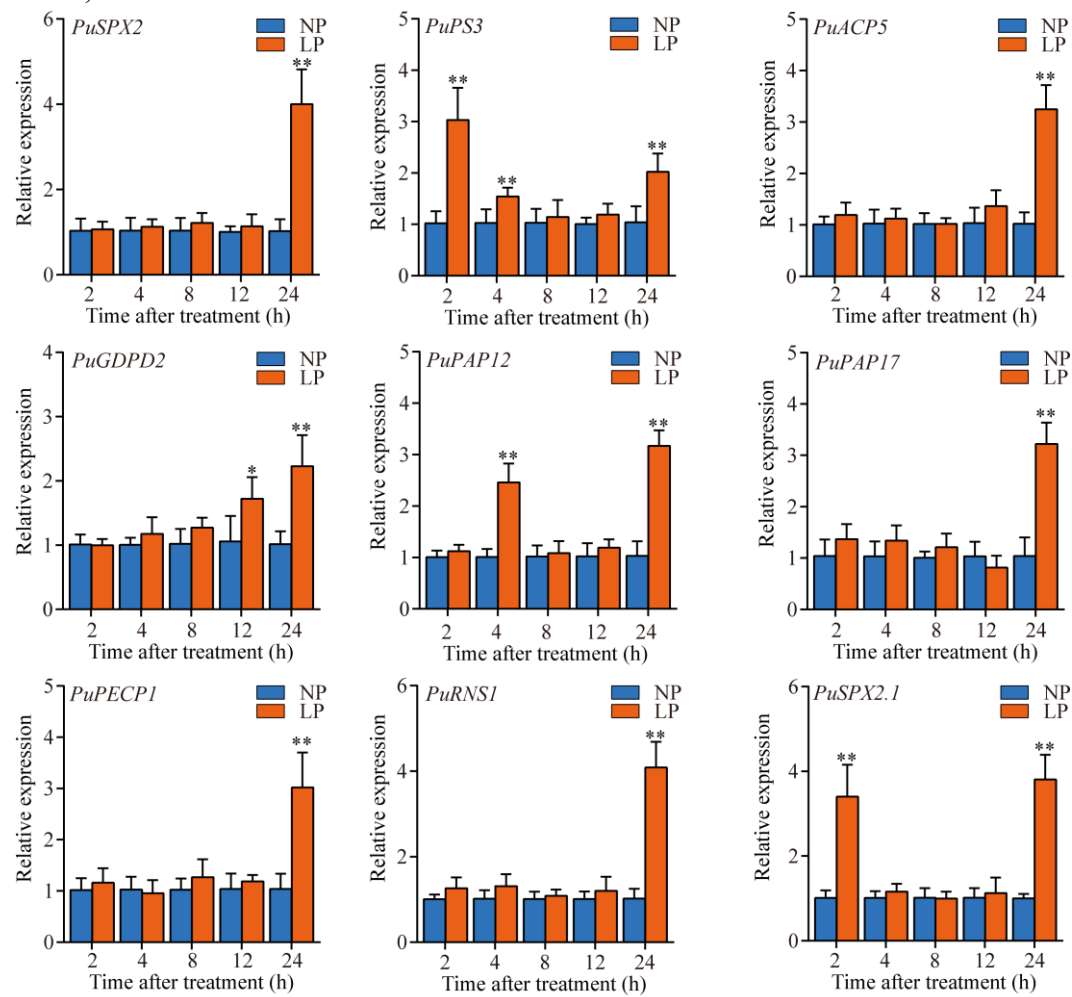

**Figure S5** The multilayered hierarchical gene regulatory network (ML-hGRN) built with Bottom-up GGM algorithm where PuMYB40 and PuWRKY75 are located at the third layer and regulate LPR1 and ERF003. The genes involved in adventitious rooting (AR) related biological processes are located at the bottom layer.

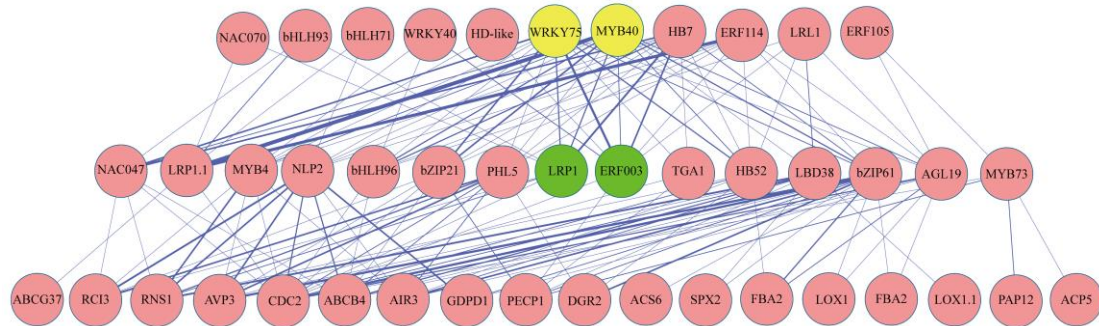

**Figure S6** PCR and RT-qPCR verified the expression level of *PuMYB40* in *PuMYB40*-overexpression (OE) and *PuMYB40-SRDX* lines. (a) and (c) PCR confirmation of *PuMYB40-OE* and *PuMYB40-SRDX* lines, respectively. M represents DNA marker, P represents PCR product with pBI121-*PuMYB40* and *PuMYB40-SRDX* plasmid DNA as template, #1-13: PCR products with genomic DNA from resistant seedlings. (b) and (d) Quantitative analysis of the expression levels of *PuMYB40-OE* and *PuMYB40-SRDX* lines, respectively. *PuActin7* and *PuUBQ10* served as internal control. The asterisks indicate very significant (\*\*  $p < 0.01$ ) difference between *PuMYB40* transgenic lines and WT, based on Student's *t* test.

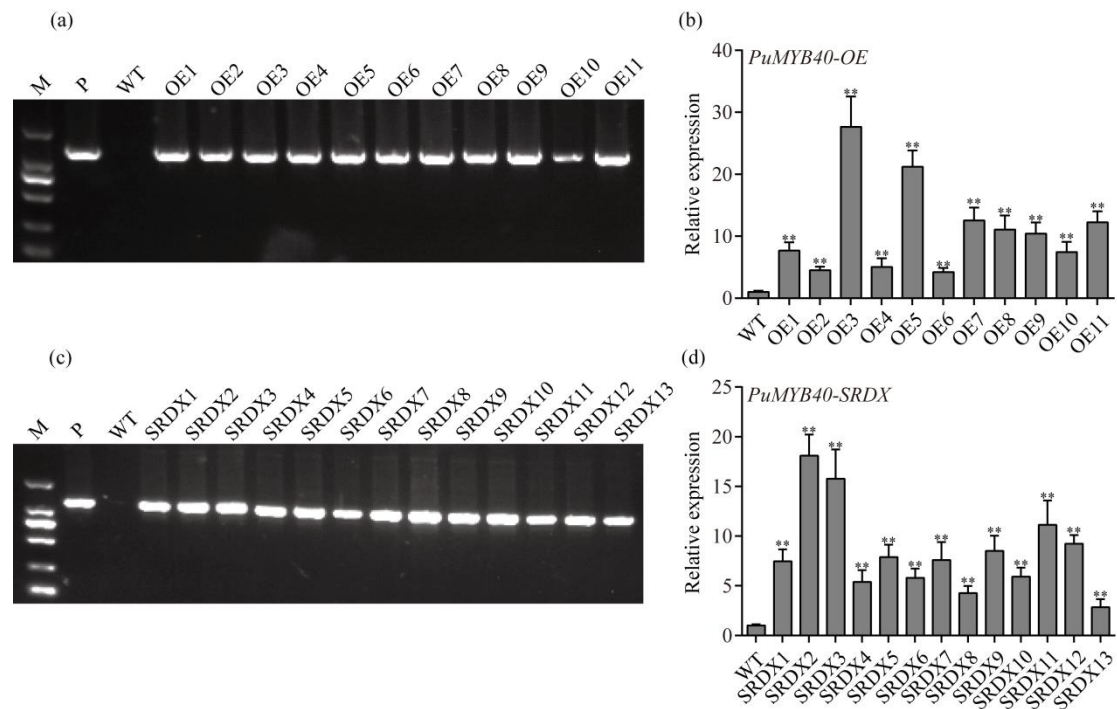

**Figure S7** Phylogenetic analysis and expression pattern of *PuWRKY75*.

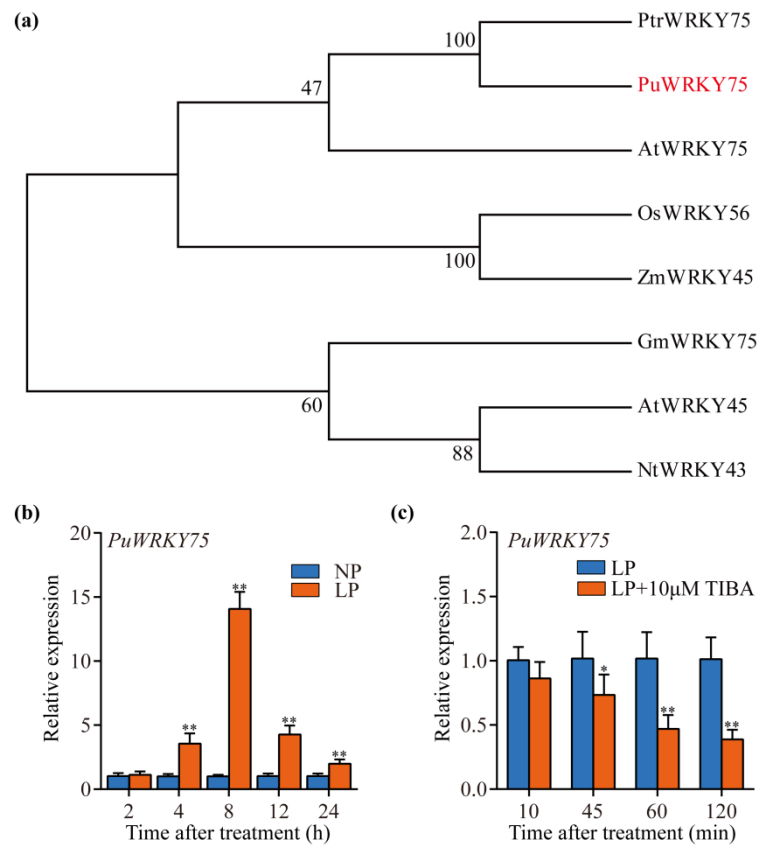

**Figure S8** PCR and RT-qPCR verified the expression level of *PuWRKY75* in *PuWRKY75*-overexpression (OE) and *PuWRKY75*-SRDX lines. (a) and (c) PCR confirmation of *PuWRKY75*-OE and *PuWRKY75*-SRDX lines, respectively. M represents DNA marker, P represents PCR product with pBI121-*PuWRKY75* and *PuWRKY75*-SRDX plasmid DNA as template, #1-13: PCR products with genomic DNA from transgenic lines. (b) and (d) Quantitative analysis of the expression levels of *PuWRKY75*-OE and *PuWRKY75*-SRDX lines, respectively. *PuActin7* and *PuUBQ10* served as internal control. The asterisks indicate very significant (\*\*  $p < 0.01$ ) difference between *PuWRKY75* transgenic lines and WT, based on Student's *t* test.

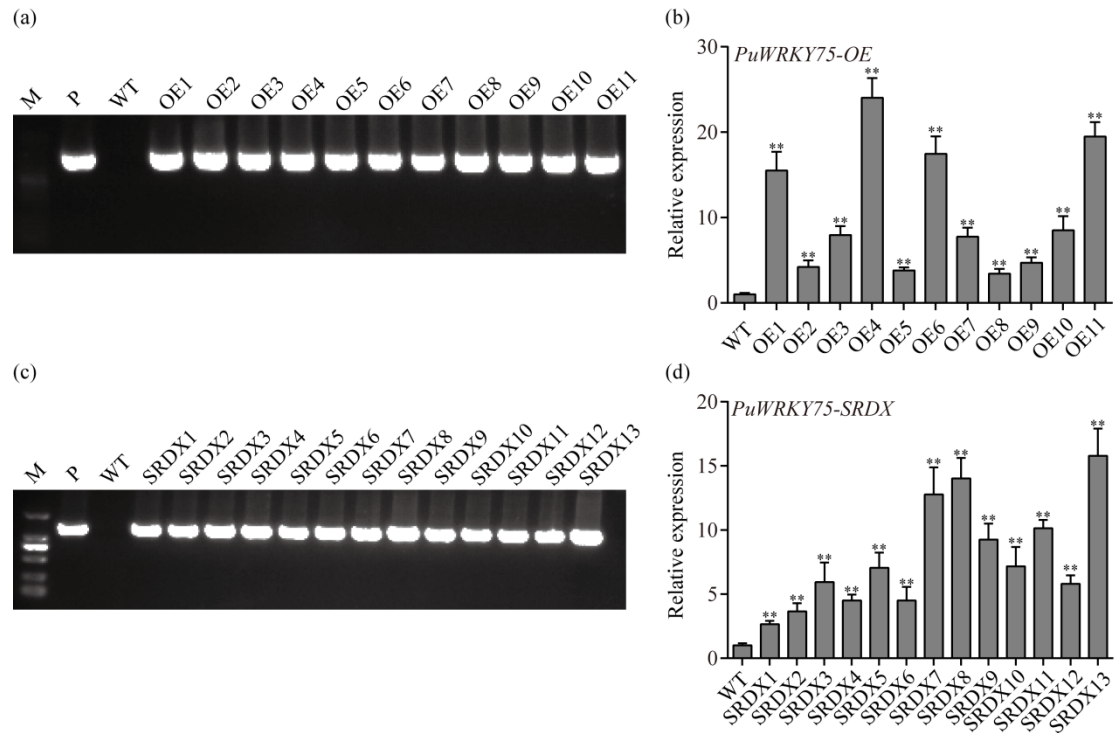

**Figure S9** The promoter sequence of *PuLRP1* and *PuERF003*.

(a)

>PuLRP1pro

```
AAAGTTACTACGGAGACGCGACATCGACTTCGCGTGTGCGCCCTTAGTGCCTAACACCTTGGCTTATCTTGCTATATATATAAAAAATATTGTAA
CCAAAAACACGTTGTTCTGATTCCCTGTTGGATGATATGATGTTTGTGACGCACATTGGTGAAAAATTAAGTGGTAATTATCAAAATTAATTA
AATTTTGTATTCGGTATATATAAGTTTCAGTATTTAATTACGAAGAAACCTTTTTTTTTTACTTCCTGTTTGAAAAATATAAAATTATACAAAAA
ATATATTTATTTATATATTTATTTTTTAAAAATATTTTGTCTCTACTATCTATATTTTTTATTAATTAATAATAATCCAATGCTACCTTACCTAGAAAG
AATTTCCCTATGAACAATTCTATATTGATACAGTGTATTAATAAAATTAATAATCTTCTAGATACCTAAATATTAATAAAAAAACACATATATCTC
CTGATCATGATGCAGATGAAGATTCAAATACCTATGAACAATTCTACGTAGATGAGGATTATACATTAAGATTTCGTGCTAGCGGTCCTGGCA
GGGAATTCCTCTATCTCTGCACCTCTAGATTGCAACCTTTGTGTGATGTTTGTCTATCCCCGTGGTGTCTTACCTGCCTATTGGGCTTGTAAGTGT
TCAGTAGATCTGGAGATTATTCGTGGTGTGTATAAGCTGACCCGGACACCCGGGTAAAAAAAATTAATAACCAATATTTTGATTTTTATAA
TTATTACTTACAATCTTATAATTATTAATCTTGGAACTCCTGTAACGACAGAGGAGGTCACCATTTCTTTCCACTGCCTCACCTGTGCTGCCATTCC
ACTGCATCAAAGGCTACTGGTAAGTAAATAAATGAAGATGCATATTACAGATAGGATAAAAGTGACTTAACCTTTATTTTTTGTACTTTAA
AATTAACAGGCAATTATTGCTTCTTAAATTTGGTGGATTAATTATGAGAGGAGAAAAATAATTAAGCCATTACATTTTAGTTCGAGAAATATAAA
ATGAACATATATTTAACATTAATAATCCTATGAACCTGGATGTTTACTTTTCAGAATAAAATAAAATAAAATCTATATATTTCCCTTATTCATTGATT
AAATATATTTCTTGAATCATTTTATGTATTAATCAATATGTTTTTGAGTGATTTTAAAAAATTTATTCATCTATTATTAGTATAATGTATTTAAAAAT
AATAATAAAATTTGATGAATTTTTGAATAAAAAAGTTGAAAGATTTTCTAATGTATTTTATACAAGGAGATATAATTTTTAATAATAGAATGCGTT
TTAAATTTGAGTTTCAAAAAAATTTATTTTGTAAAAAATATTAATTAATTTTTTAGTATTTTTTAATAATTTAATATATTTTAAATAAAAATA
TTTTCATGAATGGATATGTGGCTACAAGTAATAATCCCTAAAAAAGAAAGAAAGAGAGTATTACAGTTAGAAACAGAGGAATTT
CAGAACACAGTAGTTGACTACCAGTAGAAAAAGGCAACTCTGCAACAATCTCTCTCTGAGCAGCAATAATTGCCCTTCATGTTGTACACTTC
TATATCATTGTAAAGCTTAGCTAGCTAGCTCATATCCATCACTTAAGTCCCATGCAAGCTTTCTTTGTACTATACACAATCATCCACTTA
CATTCTTGATACAAACATCAACCGTGGCCACTTCAACTCCTAGTACCCTCACCACCTCCAAAACATGGCCACCACGCCACATCCAGTCACC
ACCACTACCTTCCCACCTGATCATACAAAC
```

(b)

>PuERF003pro

```
GTCAAAACTCCATACGCTCTAGGATTAATAATCATTTACTATAAATTATATTGTCCTGGTTACTGCAGCGAGGTCATACCCCTAGAACTCAGGCA
AATGATTGCTTCTAATATGGTAAAGTCCCTCTGCCATGGGAACAGCTCTGTATACCCCTAGAACTCAGGCAAAATGATTGCTTGTAAATGGTA
AGTCCCTCTGCCATGGGAGCAGCTCCCGACACAGAGAAGCAAAACAGTCAAAATTAGCAACTGTAGAGATCGGGAGTGCTTCTACGATCAAT
TTTGTTTTTATTTTAAAAATTTTAAATTTATTTTAAATTTTATTTTATATTTTAAATTTTAAATTTTAAATTTTAAATTTTAAATTTTAAATTTTAA
AAAAATTTATTTTAAATATATTTGTAGATAAAATTCACCTTTAAAAAGTAAATTTGACACCCACGTAACACACTACCCAAAGATAACATGAAGAATG
ATCTTAAACTACAGTATACCTCAACTTGATCAGAAAAATAATCAATTTATTTTATTTTATTTTATTTTATTTTATTTTATTTTATTTTATTTTATTTTAT
TAGGGTCTCATTCTGTAGCATGGGGTCCATGCTTGGCACAATGAGTCTACAGTAAACATCAAGCATGGCCAAGAGGCAACCCAAACCCAAAC
CATGTACACTGTTTGTCTTCTATATATAATCTGTGGCGTATGCTCATGTTTCAAAATTTGTGCGCCATATAAAACCCAAACGCAAGAAACAAAAG
AAAGAAGCAACCCCTTGCTACAAGTCACGAGCCCATCATAGATTTATTAAGAATTGATAGCGTTTAGTTGCTCTCTCGTGAAGAAAAAAGAATT
CATTCAAGATCATGTATGATAAATAATATGTTTTATATAATCTGTTTCTGTTTTCGAAATACCAACGCGTGAATGAGTAAGCTAGTGAAT
GCTTTATGTTGAACAATCACCATACGCTTATTAATAAATTAGAAATCCTTCTGTGCGAGAAACAGAGACATCTGGGTTGTATGCAAGAAAAATAA
TCTTTAGCTGCTCTTAGTGCAATGTTGATTCTGTTATATAGTGAATAAGATTTGATCAAAATGATTGGATTGTTAGGGCAATTATTTATGGTCTAAGA
ATCTTTAATAGTTGTGTCTCAACTTAGGATTGACCAATTATGCTGTGTTCCAAATTTCTGATGAGCCTGTTTTTAACTGTGGACCATTAAAT
GACCAATGTAAATTAAGAGAACTGTACATCTACCACAAACAGGGTAAATTAAGTCCCGTTTTTGCATCTAAATTTGTGGCTTAAACTCCCA
CATGCCCCCAATTAATTTCTTTCTTTTTTAAAAAATAAAAAATAAAAGCTAAAGCTACCTCAAATAAGCTTCGGGTCTCTGGACATGAAGAA
AAGAGAGAGTTGTGGTGGAGTCGTTATCTTTGCTAGGCTGCTAACACATAACACTCACATGCATGAAGAGATGAATATCTACAAGACTATGAC
CTTAGATTTTCTTGAAGGTAGAGAGAAGCTTCCAAAGCGAACAGTTGAATATTTGATTTTTTGTCTTTTCTTTTCAATCATGAAACAAA
AGCTATTACATATCTTGGTCATGTGAAATGAATTTGGATTTCAGTTTGAATTTCCACTTACCCAAAATATATTCAATTATATCATACTTATAATAA
TAAAGCCAGCCAAGATAAAGAAAGGAATAGAAAGACCTAAACCCCAAGTTGGGGACCCACTTCTTAAATTTGGTTGCCAGACGAGCTTGCCT
TATATCTTTCAACAAACCCAGCTACAAAAACCCCTCTTCCCACCCCTTCATCAGCATCACTCCCTTGCTTTCCAACATTTCTCCCTTTTCTTA
CAGGCAATTTCAACAAACACTTTCTCAAAGAAACGTTTCTTTTTTTCACGAAC
```

**Figure S10** PCR and RT-qPCR verified the expression level of *PuLRP1* and *PuERF003* in *PuLRP1* and *PuERF003* transgenic lines, respectively.

(a), (c), (e) and (g) PCR confirmation of *PuLRP1* and *PuERF003* transgenic lines, respectively. M represents DNA marker, P represents PCR product with pBI121-*PuLRP1*, pBI121-*PuERF003*, *PuLRP1*-SRDX and *PuERF003*-SRDX plasmid DNA as template, #1-14: PCR products with genomic DNA from resistant seedlings.

(b), (d), (f) and (h) Quantitative analysis of the expression levels of *PuLRP1* and *PuERF003* transgenic lines, respectively. *PuActin7* and *PuUBQ10* served as internal control. The asterisks indicate very significant (\*\*  $p < 0.01$ ) difference between *PuLRP1* and *PuERF003* transgenic lines and WT, based on Student's *t* test.

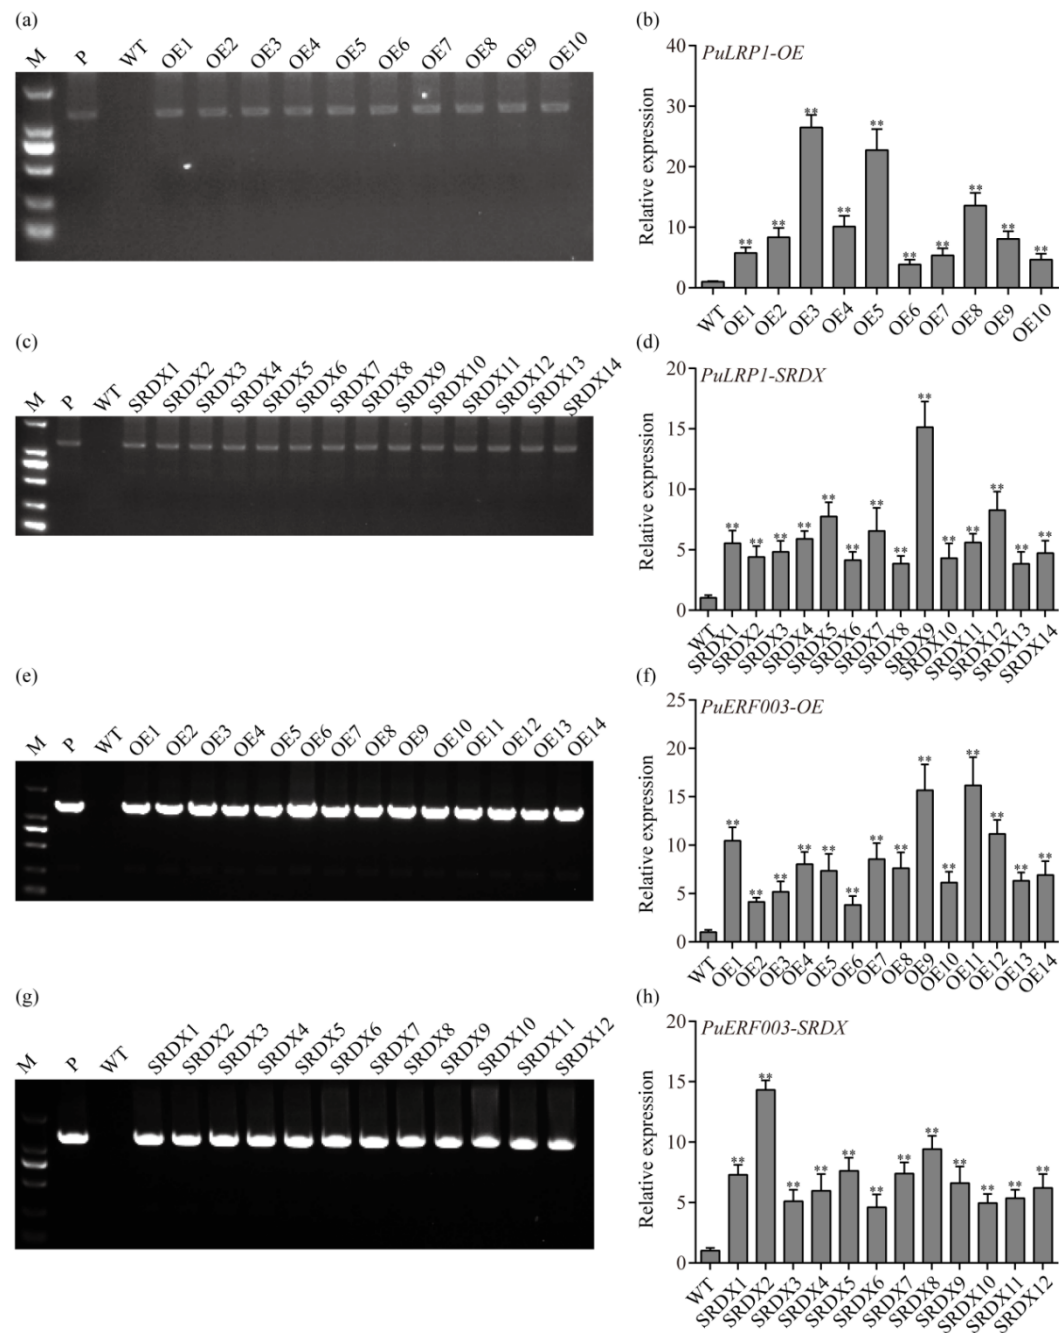

Supplement: PBI-20-1561-s002.pdf [file PBI-20-1561-s002.pdf]
